# Supplementary material for: How Promising Are “Ultraprocessed” Front-of-Package Labels? A Formative Study with US Adults
Source: MDPI journal article supplement (doi:10.3390/nu16071072), 2024-04-06
Supplement: s1 [file s1]

**Table S1. Mixed-effect models assessing the effect of “ultraprocessed” labels on perceived attention, thinking about risks, and discouragement from buying (n=595)**

|                                 | Attention |       |            | Thinking about risks |       |              | Discouragement from buying |       |              |
|---------------------------------|-----------|-------|------------|----------------------|-------|--------------|----------------------------|-------|--------------|
|                                 | $\beta$   | SE    | 95% CI     | $\beta$              | SE    | 95% CI       | $\beta$                    | SE    | 95% CI       |
| <b>Label</b>                    |           |       |            |                      |       |              |                            |       |              |
| UPF label (vs. control)         | 0.04      | 0.04  | -0.03,0.11 | 0.34***              | 0.06  | 0.23,0.45    | 0.38***                    | 0.06  | 0.27,0.49    |
| UPF+Sugar (vs. UPF label)       | 0.08*     | 0.04  | 0.01,0.16  | 0.40***              | 0.06  | 0.28,0.51    | 0.33***                    | 0.06  | 0.22,0.44    |
| <b>Gender</b> (reference: male) | <0.01     | 0.11  | -0.20,0.21 | -0.04                | 0.11  | -0.26,0.18   | -0.12                      | 0.11  | -0.33,0.10   |
| <b>Age</b>                      | <0.01     | <0.01 | -0.01,0.01 | -0.01***             | <0.01 | -0.01,>-0.01 | >-0.01*                    | <0.01 | -0.01,>-0.01 |
| <b>Higher education</b>         | -0.17     | 0.10  | -0.38,0.03 | 0.30***              | 0.11  | 0.09,0.51    | 0.31***                    | 0.10  | 0.12,0.50    |
| <b>Race</b> (reference: white)  |           |       |            |                      |       |              |                            |       |              |
| Black                           | 0.24      | 0.13  | -0.02,0.50 | 0.28*                | 0.14  | 0.01,0.55    | 0.23                       | 0.14  | -0.04,0.50   |
| Other                           | 0.03      | 0.17  | -0.29,0.36 | -0.01                | 0.17  | -0.35,0.33   | 0.01                       | 0.17  | -0.33,0.34   |
| <b>Hispanic ethnicity</b>       | 0.27      | 0.15  | -0.02,0.56 | 0.38*                | 0.15  | 0.08,0.68    | 0.26                       | 0.15  | -0.04,0.56   |
| <b>Good overall health</b>      | 0.16      | 0.11  | -0.06,0.37 | 0.32***              | 0.11  | 0.10,0.55    | 0.29*                      | 0.11  | 0.06,0.51    |

Note: UPF=ultraprocessed food

\*Statistically significant at the 95% confidence level

\*\*\*Statistically significant at the 99% confidence level
